# Supplementary material
Source: PubMed Central journal article supplement (PMC7822637)
Supplement: supplementary_table_1_ioaa101.pdf [file supplementary_table_1_ioaa101.pdf]

**Supplementary Table 1. Composition of experimental diets (Experiment 1)**

| <b>Contents</b>                                                                | <b>Control (Casein)</b> | <b>SBM</b> | <b>G+D</b> |
|--------------------------------------------------------------------------------|-------------------------|------------|------------|
| <b>Daidzein</b>                                                                | -                       |            | 200 ppm    |
| <b>Genistein</b>                                                               | -                       |            | 300 ppm    |
| <b>Soybeans</b>                                                                | -                       | +          | -          |
| <b>Protein (%)</b>                                                             | 19                      | 18.9       | 19         |
| <b>Carbohydrate (% by)</b>                                                     | 49                      | 47.5       | 49         |
| <b>Fat (%)</b>                                                                 | 5.4                     | 5.5        | 5.4        |
| <b>Total calories (Kcal/g)</b>                                                 | 3.2                     | 3.2        | 3.2        |
| Abbreviations: SBM= soybean meal; G+D=genistein+daidzein; ppm=part per million |                         |            |            |
