# Supplementary material
Source: PubMed Central journal article supplement (PMC7822637)
Supplement: supplementary_table_2_ioaa101.pdf [file supplementary_table_2_ioaa101.pdf]

**Supplementary Table 2: Composition of experimental diets (Experiment 2)**

| <b>Contents</b>                                                                          | <b>Control (Casein)</b> | <b>Dai</b> | <b>Gen</b> | <b>G+D</b> |
|------------------------------------------------------------------------------------------|-------------------------|------------|------------|------------|
| <b>Daidzein</b>                                                                          | -                       | 200 ppm    | -          | 200 ppm    |
| <b>Genistein</b>                                                                         | -                       | -          | 300 ppm    | 300 ppm    |
| <b>Protein (%)</b>                                                                       | 19                      | 19         | 19         | 19         |
| <b>Carbohydrate (%)</b>                                                                  | 49                      | 49         | 49         | 49         |
| <b>Fat (%)</b>                                                                           | 5.4                     | 5.4        | 5.4        | 5.4        |
| <b>Total calories (Kcal/g)</b>                                                           | 3.2                     | 3.2        | 3.2        | 3.2        |
| Abbreviations: Dai=Daidzein; Gen=genistein; G+D=genistein+daidzein; PPM=part per million |                         |            |            |            |
