# Supplementary material
Source: PubMed Central journal article supplement (PMC7822637)
Supplement: supplementary_table_3_ioaa101.pdf [file supplementary_table_3_ioaa101.pdf]

**Supplementary Table 3. Antibody table**

| Target                                        | Antibody sequence                                                                                                                                      | Name of Antibody                            | Manufacturer, Catalog Number                              | Polyclonal/ Monoclonal       | Dilution Used |
|-----------------------------------------------|--------------------------------------------------------------------------------------------------------------------------------------------------------|---------------------------------------------|-----------------------------------------------------------|------------------------------|---------------|
| <b>InhibinB-β</b>                             | Belongs to the TGFβ superfamily of growth and differentiation factors. Genetic locus: INHBB (human) mapping to 2q14.2; inhbb (mouse) mapping to 1 E2.3 | Inhibin β-B (B-9): sc-390959                | Santa Cruz Biotechnologies, sc-390959 MW 45kDa            | Mouse monoclonal IgG         | 1:1000        |
| <b>Anti-Mullerian Hormone</b>                 | Genetic locus: AMH (human) mapping to 19p13.3; AMH (mouse) mapping to 10C1                                                                             | MIS (C-20)                                  | Santa Cruz Biotechnologies, Sc-6886 MW (AMH) 70/74 kDa    | Mouse monoclonal IgG         | 1:2000        |
| <b>Estrogen Receptor-1</b>                    | Belongs to the nuclear hormone receptor family; NR3 subfamily; contains one nuclear receptor DNA-binding domain                                        | Anti-ESR- <i>a</i> (33) antibody-ChIP grade | Abcam, Ab32063 MW (ESR $\alpha$ ) 67 kDa                  | Rabbit monoclonal IgG        | 1:1000        |
| <b>Androgen Receptor</b>                      | Belongs to the nuclear hormone receptor family; NR3 subfamily; contains one nuclear receptor DNA-binding domain                                        | Anti-AR antibody (EP1535(2))                | Abcam, Ab133273 MW (AR) 89 kDa                            | Rabbit monoclonal IgG        | 1:1000        |
| <b>Luteinizing Hormone-β</b>                  | Genetic locus: LHB (human) mapping to 19q13.33; Lhb(mouse) mapping to 7B4                                                                              | Lutropin-β (R-16)                           | Santa Cruz Biotechnologies, Sc-7824 MW (LHβ) 22 kDa       | Goat polyclonal antibody IgG | 1:1000        |
| <b>Follicle Stimulating Hormone-β</b>         | Genetic locus: FSHB (human) mapping to 11q14.1; Fshb (mouse) mapping to 2E3                                                                            | FSHβ (C-19)                                 | Santa Cruz Biotechnologies, Sc-7797 MW (FSHβ) 24 kDa      | Goat polyclonal antibody IgG | 1:500         |
| <b>Steroidogenic Acute Regulatory Protein</b> | StAR (human) mapping to 8p11.23; StAR (mouse) mapping to 8A2                                                                                           | StAR (D2)                                   | Santa Cruz Biotechnologies, Sc166821 MW (StAR) 30 kDa     | Mouse monoclonal IgG         | 1:100         |
| <b>17β-hydroxysteroid dehydrogenase</b>       | Genetic locus: HSD17B1 (human) mapping to 17q21.2                                                                                                      | HSD17β (A5)                                 | Santa Cruz Biotechnologies, Sc-376719 MW (17β-HSD) 35 kDa | Mouse monoclonal IgG         | 1:2000        |
| <b>Actin-β</b>                                | Epitope mapping at the C\ terminus of actin of human origin                                                                                            | Beta Actin antibody (GT5512)                | GeneTex, GTX629630                                        | Mouse monoclonal IgG         | 1:2000        |
